# Supplementary material for: Identification of magnetic resonance imaging features for the prediction of unrecognized atrial fibrillation in acute ischemic stroke
Source: Frontiers journal article supplement (doi:10.3389/fneur.2022.952462), 2022-09-13
Supplement: Data_Sheet_1.pdf [file Data_Sheet_1.pdf]

# Supplemental Material

## Identification of magnetic resonance imaging features for the prediction of unknown atrial fibrillation in acute ischemic stroke

Chao-Hui Chen<sup>1</sup>, Meng Lee<sup>1</sup>, Hsu-Huei Weng<sup>2</sup>, Jiann-Der Lee<sup>1</sup>, Jen-Tsung Yang<sup>3</sup>, Yuan-Hsiung Tsai<sup>2</sup> and Yen-Chu Huang<sup>1\*</sup>

Department of Neurology<sup>1</sup>, Department of Diagnostic Radiology<sup>2</sup>, and Department of Neurosurgery<sup>3</sup>, Chang Gung Memorial Hospital at Chiayi, Chang-Gung University College of Medicine, Taiwan

### Table S1.

*Baseline characteristics, imaging findings and outcomes in two cohorts*

### Figure S1.

*Study flowchart for the classification of DWI patterns.*

### Figure S2.

*Illustration of DWI patterns in posterior circulation.* Single cortical infarct (A), single subcortical infarct (<20mm) (B), single subcortical infarct (>20mm) (C), small scattered cortical or subcortical lesions (D), border zone infarcts (E), other cortical and subcortical infarcts (F) and multiple territories (G).

**Table S1.***Baseline characteristics, imaging findings and outcomes in two cohorts*

| Characteristics                                  | AFTER PULSE<br>cohort | Left Atrial<br>Enlargement cohort | <i>p</i> |
|--------------------------------------------------|-----------------------|-----------------------------------|----------|
| Total patients                                   | 368                   | 366                               |          |
| Age                                              | 75 (69–81)            | 65 (56–76)                        | <0.001   |
| Female gender                                    | 139 (37.8)            | 123 (33.6)                        | 0.239    |
| <b>Stroke information</b>                        |                       |                                   |          |
| Baseline NIHSS                                   | 4 (2–7)               | 4 (2–6)                           | 0.028    |
| ESUS                                             | 81 (22.0)             | 98 (26.8)                         | 0.133    |
| Diabetes mellitus                                | 168 (45.7%)           | 172 (47.0)                        | 0.715    |
| Hypertension                                     | 293 (79.6)            | 279 (76.2)                        | 0.268    |
| Hypercholesterolemia                             | 134 (36.4)            | 154 (42.1)                        | 0.116    |
| Coronary artery disease                          | 32 (8.7)              | 36 (9.8)                          | 0.594    |
| Old stroke                                       | 76 (20.7)             | 103 (28.1)                        | 0.018    |
| Congestive heart failure                         | 7 (1.9)               | 7 (1.9)                           | 0.992    |
| Intravenous rt-PA treatment                      | 17 (4.6)              | 18 (4.9)                          | 0.850    |
| Newly-detected atrial fibrillation               | 40 (10.9)             | 24 (6.6)                          | 0.038    |
| <b>Imaging patterns</b>                          |                       |                                   |          |
| Territorial infarcts                             | 11 (3.0)              | 7 (1.9)                           | 0.346    |
| Single cortical infarct                          | 9 (2.4)               | 18 (4.9)                          | 0.075    |
| Single subcortical infarct (diameter<20mm)       | 146 (39.7)            | 143 (39.1)                        | 0.867    |
| Single subcortical infarct (diameter ≥ 20mm)     | 34 (9.2)              | 27 (7.4)                          | 0.361    |
| Small scattered cortical or subcortical infarcts | 49 (13.3)             | 47 (12.8)                         | 0.849    |
| Border zone infarcts                             | 30 (8.2)              | 28 (7.7)                          | 0.801    |
| Other cortical and subcortical infarcts          | 71 (19.3)             | 72 (19.7)                         | 0.897    |
| Multiple territories                             | 18 (4.9)              | 24 (6.6)                          | 0.331    |
| Relevant vessel stenosis >50%                    | 159 (43.4)            | 142 (38.9)                        | 0.213    |
| Susceptibility vessel sign                       | 16 (5.1)              | 15 (4.2)                          | 0.600    |
| Early hemorrhage                                 | 20 (6.2)              | 24 (6.6)                          | 0.823    |

Values presented as n (%) and median (interquartile range).

Abbreviations: AF, atrial fibrillation; ESUS, embolic stroke of undetermined source; IQR, interquartile range; NIHSS, National Institutes of Health Stroke Scale; rt-PA, recombinant tissue plasminogen activator.

**Figure S1.** Study flowchart for the classification of DWI patterns.

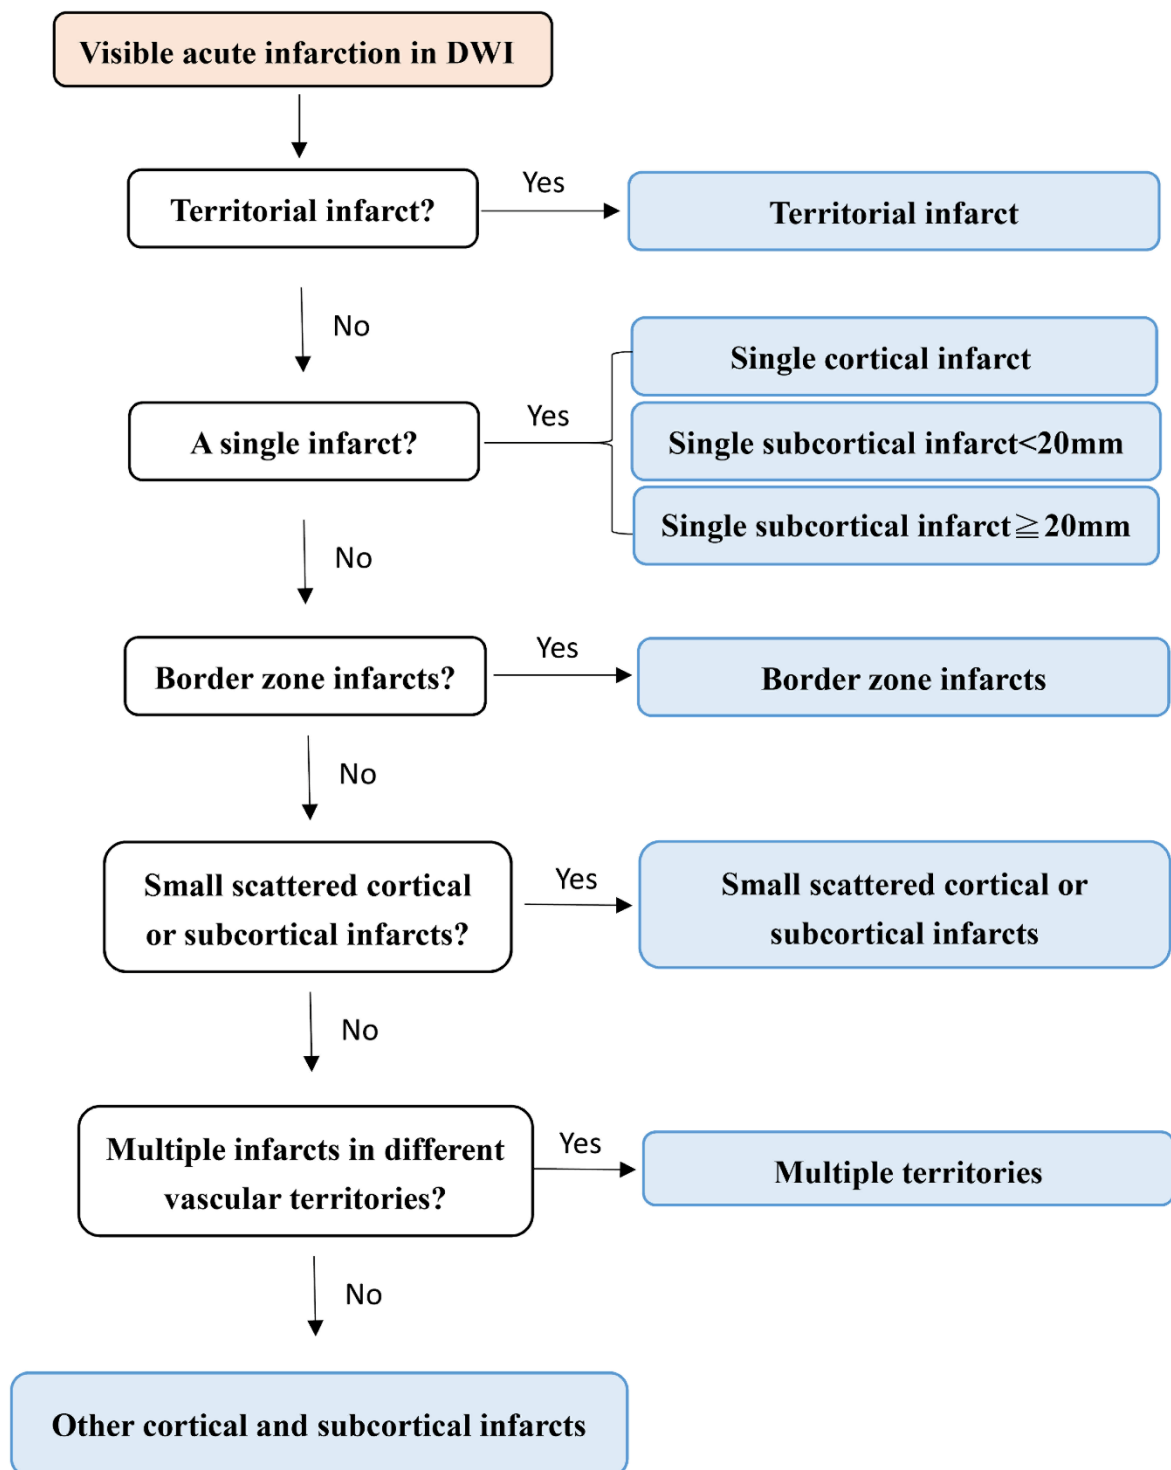

**Figure S2.**

*Illustration of DWI patterns in posterior circulation.*

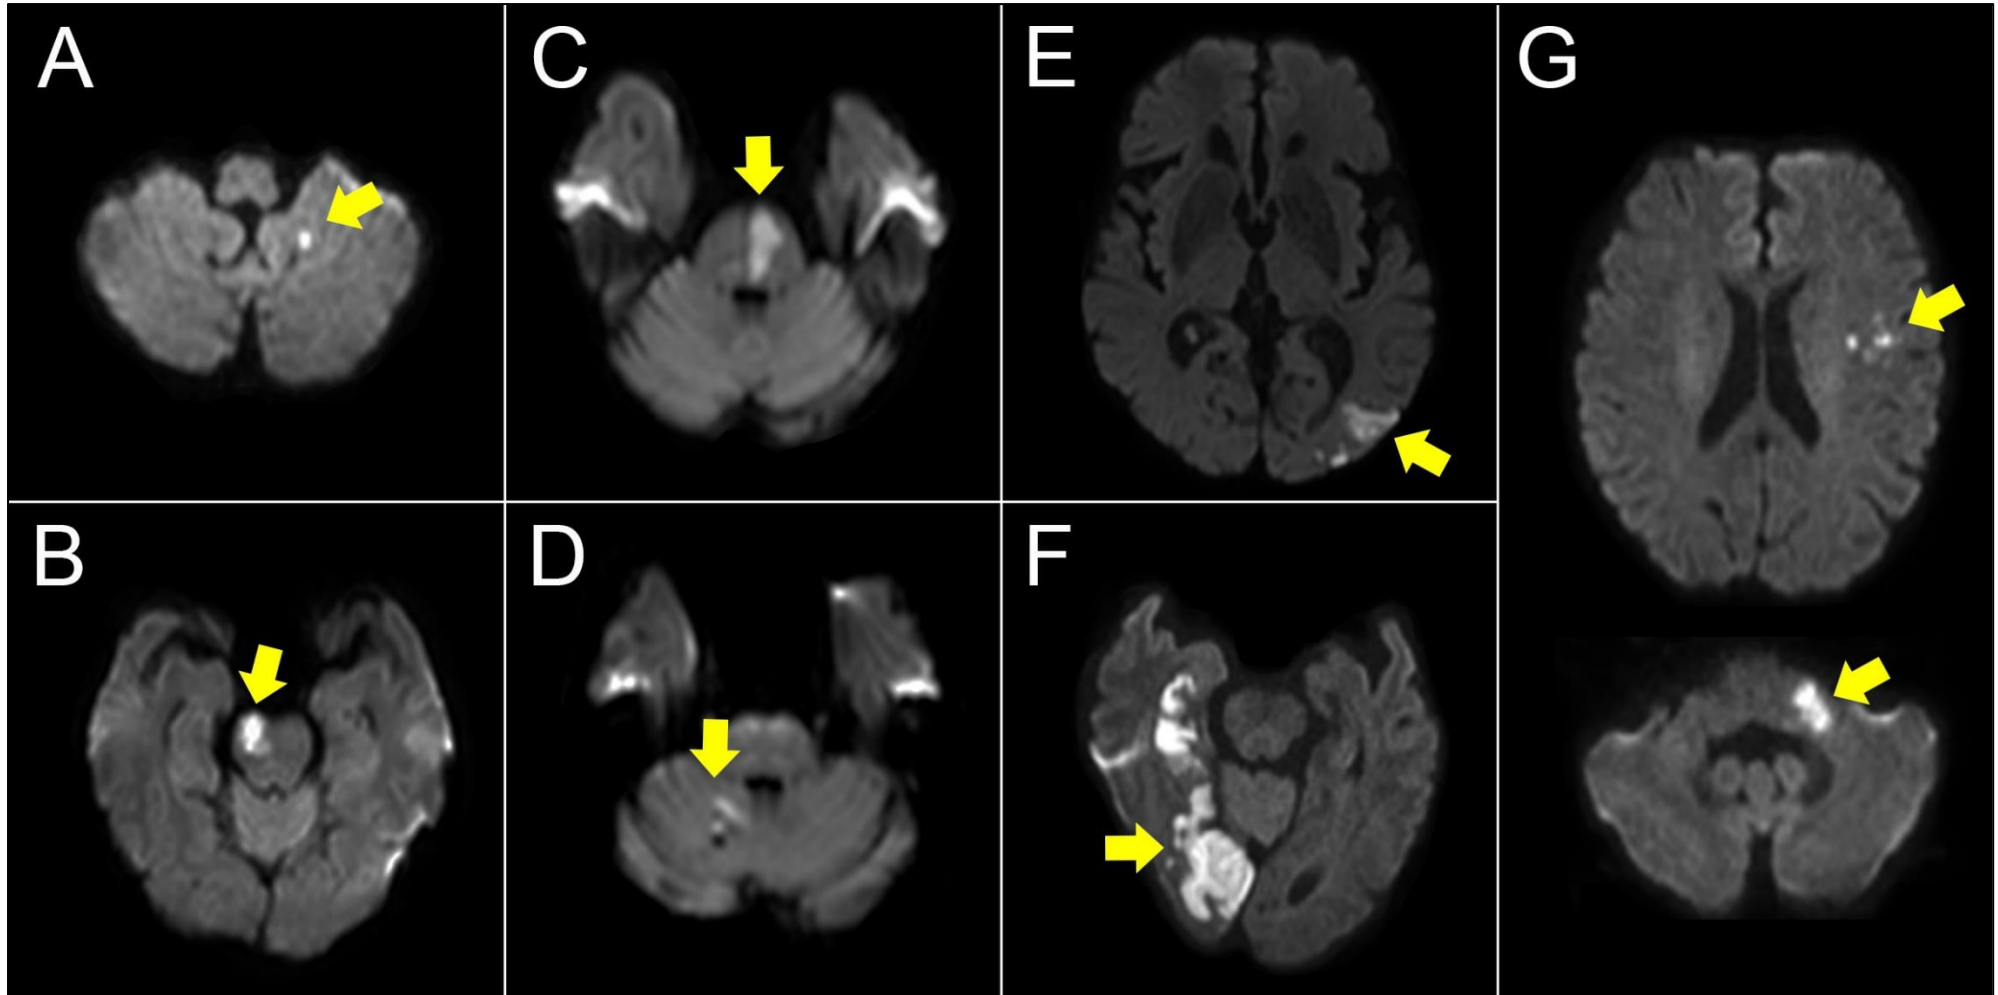

Single cortical infarct (A), single subcortical infarct (<20mm) (B), single subcortical infarct (>20mm) (C), small scattered cortical or subcortical lesions (D), border zone infarcts (E), other cortical and subcortical infarcts (F) and multiple territories (G).
